# Supplementary material for: Feline Calicivirus Virulent Systemic Disease: Clinical Epidemiology, Analysis of Viral Isolates and in vitro Efficacy of Novel Antivirals in Australian Outbreaks
Source: Preprints.org preprint supplement (doi:10.20944/preprints202108.0341.v1), 2021-08-16
Supplement: Supplementary file 1 [file supplementary]

**Supplementary Table S1:**

| | **Cases** | **Read Count** | **Contigs** | **Reads Mapped** | **Reads per Million** | | --- | --- | --- | --- | --- | | NSW5_V1 | 127241260 | 30735 | 106347262 | 835792.27 | | NSW5_V2 | 112946412 | 891879 | 152719 | 1352.14 | | NSW9_V1 | 131951868 | 24750 | 99536924 | 754342.67 | | NSW9_V2 | 131951868 | 24750 | 8569729 | 64945.87 | | QLD5 | 126373048 | 141343 | 15854083 | 125454.62 | | QLD6 | 142583738 | 101261 | 18998254 | 133242.78 | | QLD8 | 122917554 | 28307 | 22086249 | 179683.44 | | QLD9 | 123342872 | 163172 | 14335903 | 116228.06 | | QLD10 | 125677722 | 20343 | 19605713 | 155999.91 | | QLD12 | 125046816 | 98305 | 16353907 | 130782.27 | | QLD13 | 83299626 | 1860 | 42785903 | 513638.60 | | ACT1 | 142608064 | 73633 | 47644293 | 334092.56 | | ACT2 | 134000790 | 33540 | 107954102 | 805622.88 | | ACT3 | 94284000 | 5430 | 43940299 | 466041.95 | | ACT7 | 145687464 | 18221 | 52198716 | 358292.43 | | ACT9 | 117711790 | 17228 | 42174952 | 358289.96 | | **Total** | 1855673024 | 1650007 | 1516128084 | 817023.29 | | **Median** | 126025385 | 32137 | 32130600 | 254953.40 | |
| --- | --- | --- | --- | --- | --- | --- | --- | --- | --- | --- | --- | --- | --- | --- | --- | --- | --- | --- | --- | --- | --- | --- | --- | --- | --- | --- | --- | --- | --- | --- | --- | --- | --- | --- | --- | --- | --- | --- | --- | --- | --- | --- | --- | --- | --- | --- | --- | --- | --- | --- | --- | --- | --- | --- | --- | --- | --- | --- | --- | --- | --- | --- | --- | --- | --- | --- | --- | --- | --- | --- | --- | --- | --- | --- | --- | --- | --- | --- | --- | --- | --- | --- | --- | --- | --- | --- | --- | --- | --- | --- | --- | --- | --- | --- | --- |
